# Supplementary material for: Bub1 Facilitates Virus Entry through Endocytosis in a Model of Drosophila Pathogenesis
Source: PubMed Central journal article supplement (PMC6146689; doi:10.1128/jvi.00254-18), 2018-08-29

## SUPPLEMENTAL INFORMATION

Supplemental Information includes six figures, and one table.

### Supplementary Figure

#### Figure S1 | Screen data

A, Fly lines used in second-round genetic screen. Z-score was calculated as mentioned in Methods and the dash lines indicate the significant interval (most left: susceptible section; most right: resistance section).

#### Figure S2 | Related to Figure 1 *bub1* deficient flies become resistant to DCV infection

A, *bub1* mRNA expression was restored in flies with p-element precise deletion. The change of expression was measured by qRT-PCR and normalized to that of *w<sup>1118</sup>*.

B, Flies were treated by tetracycline for three generations and *Wolbachia* were detected by primers of *Wolbachia* specific *16s rRNA* and *wsp* gene. Wild type *Or<sup>R</sup>* fly with *Wolbachia* was used as positive control.

C, *pastrel* genotyping by PCR. The R allele of *pastrel* was detected by 512C primers;

The S allele of *pastrel* was detected by 512T primers. Tm gradients were a: 54°C, b:

54.7°C, c: 55.5°C, d: 58°C, e: 59.7°C, f: 62.2°C, g: 63.7°C, h: 64°C.

D, *bub1* knockdown efficiency in the whole body of flies measured by qRT-PCR.

All error bars represent standard error (s.e.) of at least three independent tests; n>15 flies for each group. \*P<0.05, \*\*P<0.01, \*\*\*P<0.001, ns, not significant. student's t-test (d), or one-way ANOVA (a).

#### Figure S3 | Related to Figure 3 *bub1* deficiency reduces DCV entry.

A, *bub1* knockdown efficiency in S2\* cells, measured by qRT-PCR. The change of expression was normalized to that of *rfp* dsRNA treated cells.

B, *bub1* knockdown in S2\* cells did not affect cell proliferation. Absorbance of OD<sub>450</sub> was normalized to S2\* cells treated with *gfp* dsRNA at day one after 3 days post *bub1* dsRNA transfection.

C, *bub1* knockdown in S2\* cells did not affect cell viability. Absorbance of OD<sub>450</sub> was normalized to S2\* cells treated with *gfp* dsRNA at each day, respectively.

Characterization of DCV infection kinetics in *Drosophila* S2\* cells (D, E). D, DCV binding kinetic at different MOI. The solid line showed the linear regression, the dashed lines represents 95% confidence band of the best-fit line.  $r^2=0.9862$ ,  $p<0.0001$ . E, DCV entry kinetic at different time points with MOI=100. Solid line, non-linear regression was used,  $r^2=0.9567$ . Dashed line, linear regression was used,  $r^2=0.9998$ ,  $p=0.008$ .

All error bars represent standard error (s.e.) of at least three independent tests; \*P<0.05, \*\*P<0.01, \*\*\*P<0.001, ns, not significant. student's t-test(a), two-way ANOVA (b, c).

#### Figure S4 | Related to Figure 4 Bub1 is involved in regulation of endocytosis.

A, Endocytosis component-deficient flies were resistance to DCV infection compared to wild-type ( $w^{1118}$ ) flies. Heterozygote flies were obtained by crossing with  $w^{1118}$  virgin. B, *bub1* mRNA expression of the whole body before or after DCV infection, measured by qRT-PCR and normalized to the wild type control.

C, *bub1* overexpression in S2\* cells had no effect on DCV entry ability (30min post infection). DCV entry ability indicated by DCV genome RNA level in S2\* cells quantified by qRT-PCR and normalized to vehicle plasmid transfected cells.

D, DCV genome level of indicated cells measured by qRT-PCR at 12h post infection, normalized to that of control.

All error bars represent standard error (s.e.) of at least three independent tests; n>60 flies (a) for each line or n>15 (b) for each time point. \*P<0.05, \*\*P<0.01, \*\*\*P<0.001, ns, not significant. Kaplan–Meier (a), or student’s t-test (b, c, d).

#### **Figure S5 | Survival rates of flies after VSV infection.**

A, Survival rates of wild-type ( $w^{1118}$ ) flies and *bub1*<sup>c04512</sup> mutant flies post VSV-GFP injection.

All error bars represent standard error (s.e.) of at least three independent tests; n>60 flies (a). \*P<0.05, \*\*P<0.01, \*\*\*P<0.001, ns, not significant. Kaplan–Meier (a).

#### **Figure S6 | 2OH-BNPP1 affects DCV replication.**

A, Inhibition of Bub1 kinase activity by high level of 2OH-BNPP1 reduced DCV loads. DCV RNA level of indicated cells measured by qRT-PCR at the indicated time and was normalized to that of DMSO treated cells.

B, 40uM 2OH-BNPP1 treatment had no impact on Bub1/AP-1-2-beta interaction upon DCV infection.

All error bars represent standard error (s.e.) of at least three independent tests; \*P<0.05, \*\*P<0.01, \*\*\*P<0.001, ns, not significant. two-way ANOVA (a).

#### **Supplementary Table1 primers and RNAi used in experiments**

|                                |
|--------------------------------|
| Rp49-F AGATCGTGAAGAAGCGCACCAAG |
| Rp49-R CACCAGGAACTTCTTGAATCCGG |
| Bub1-F TGTGATCAGGTGCTGAAACG    |
| Bub1-R TTAGACTAGCGTTTGGGGCG    |
| VSV-G-F TGCCCCACTGTCCATAACTC   |
| VSV-G-R CAGCCATCTCGAACCAGACA   |

|                                                       |
|-------------------------------------------------------|
| DCV-F TCATCGGTATGCACATTGCT                            |
| DCV-R CGCATAACCATGCTCTTCTG                            |
| GFP-F GAGCTGAAGGGCATCGACTT                            |
| GFP-R TTCTGCTTGTCGGCCATGAT                            |
| Vago-F TGCAACTCTGGGAGGATAGC                           |
| Vago-R AATTGCCCTGCGTCAGTTT                            |
| Vir-1-F GATCCCAATTTTCCCATCAA                          |
| Vir-1-R GATTACAGCTGGGTGCACAA                          |
| pAGW-bub1-F CACCATGGCCATGCACTCGTACATG                 |
| pAGW-bub1-R TCGTCGATGCAGGATGTTGGA                     |
| AP-1-2-beta-F: CACCATGACTGATTCCAAGTACTTC              |
| AP-1-2-beta-R: TTA TGGAGAACGGATGATGGC                 |
| FIL-F TGAGGAAGATAATGACGG                              |
| FIL-RCCTCTATCCTCTTTCAACC                              |
| Wsp-F CATTGGTGTTGGTGTTGGTG;                           |
| Wsp-R ACCGAAATAACGAGCTCCAG                            |
| dsBub1-F TTAATACGACTCACTATAGGGAGAGGGCACGCACCAAAGTTAAG |
| dsBub1-R TTAATACGACTCACTATAGGGAGAATGGCCTCCTTGTCATGTG  |
| dsGFP-F TTAATACGACTCACTATAGGGAGAGGCAAGCTGACCCTGAAGTT  |
| dsGFP-R TTAATACGACTCACTATAGGGAGACTCAGGTAGTGGTTGTCGGG  |
| Bub1 siRNA 1 CCAGAATGGCAGTGTATTA                      |
| Bub1 siRNA 2 CAACAACAATACAGGTTAT                      |

Bub1 siRNA 3 GCCTCATGCTGAAGAGTTT

512C-F CAGCATGGTGTCCATGAAGTC

512T-F CAGCATGGTGTCCATGAAGTT

512-R ACGTGATCAATGCTGAAAGT

# Supplemental Figure 1

A

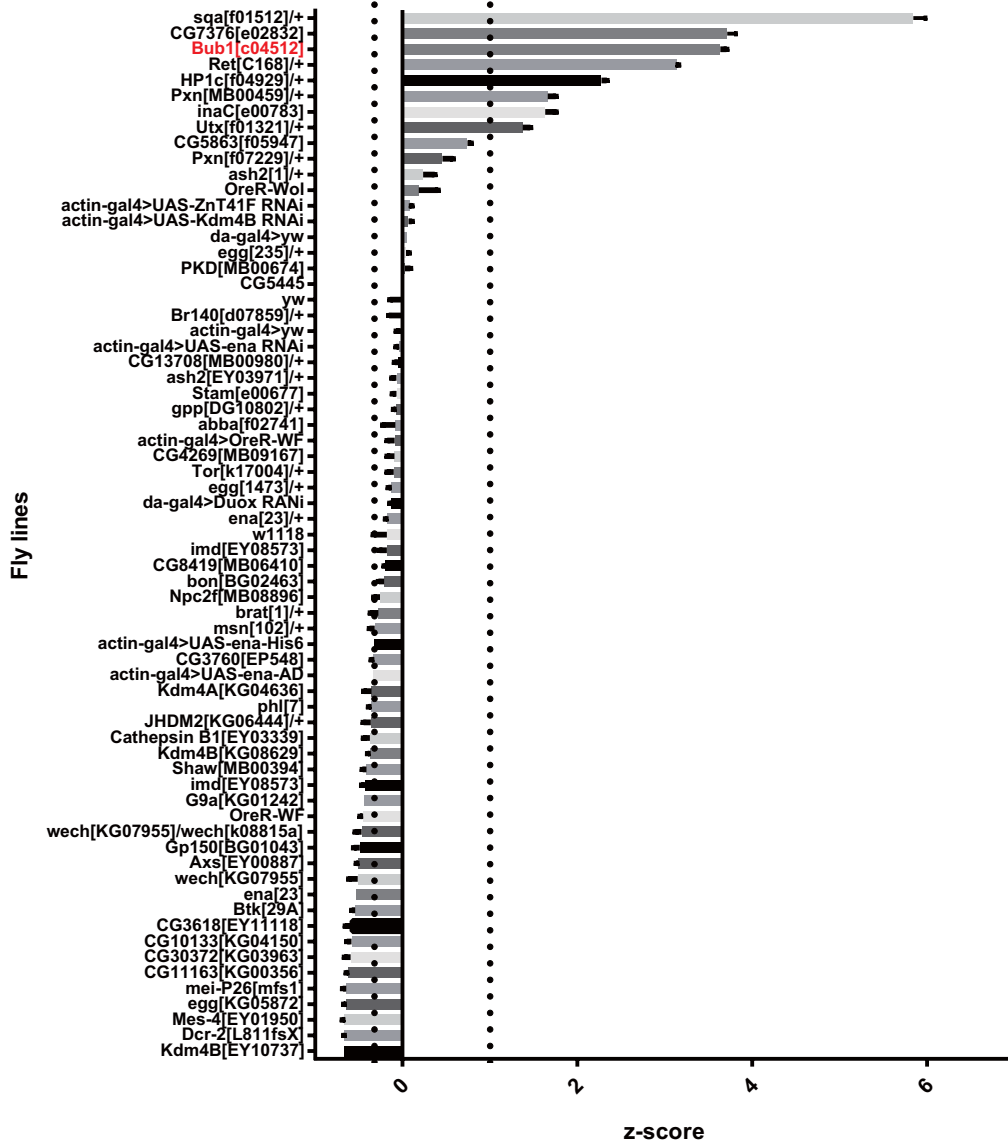

# Supplemental Figure 2

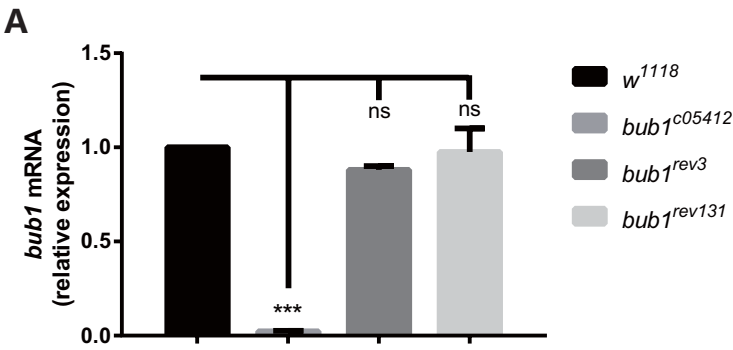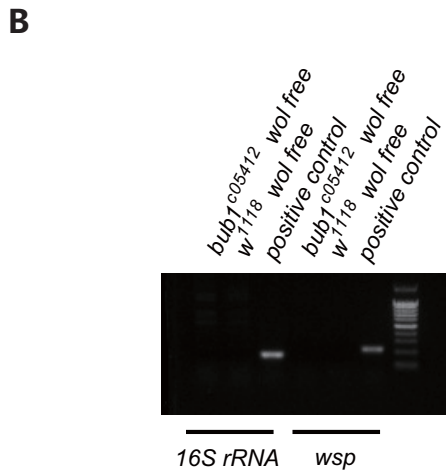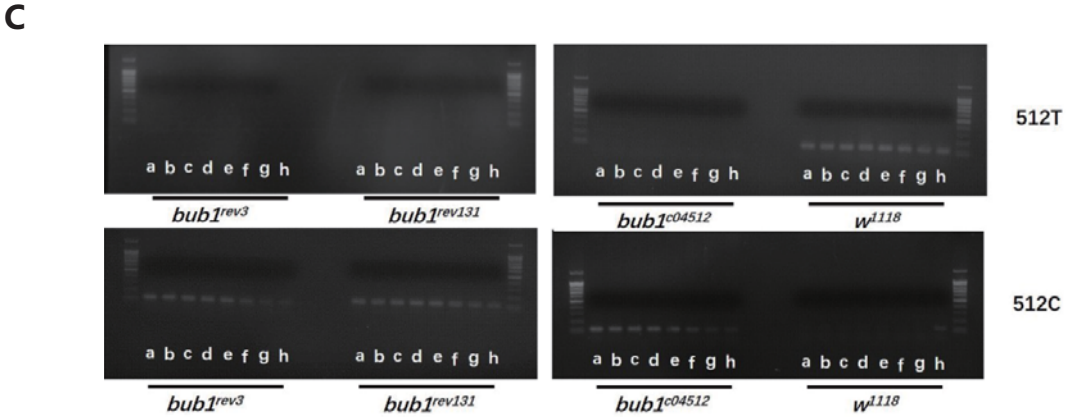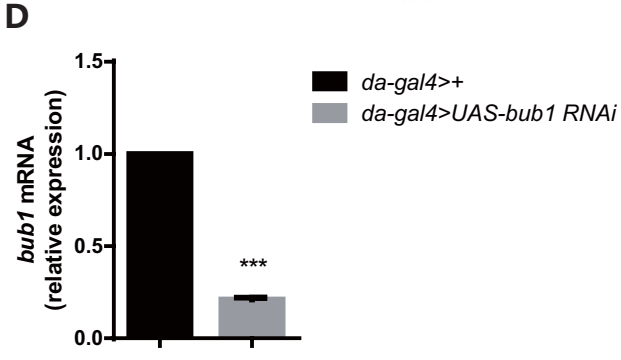

# Supplemental Figure 3

**A**

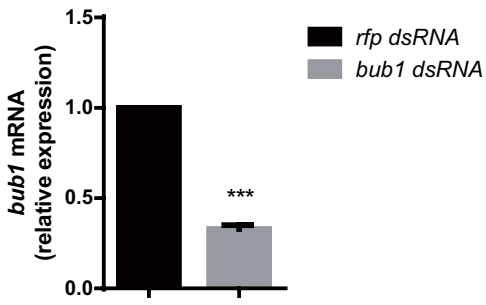

**B**

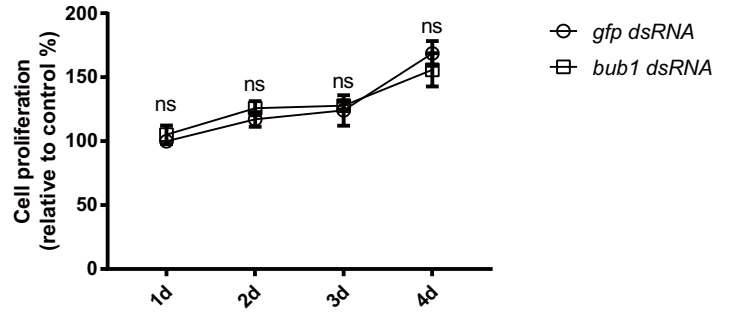

**C**

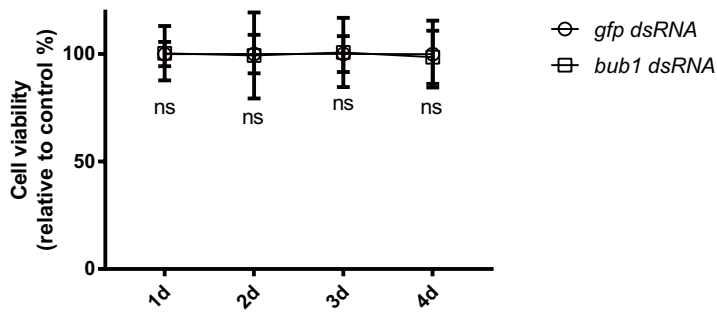

**D**

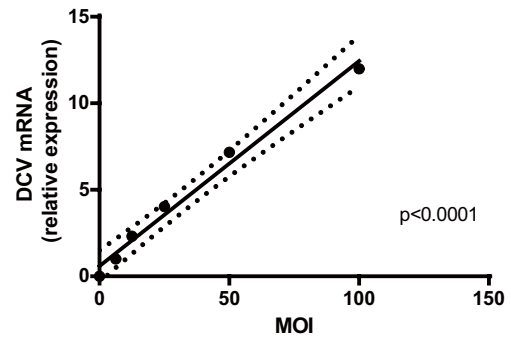

**E**

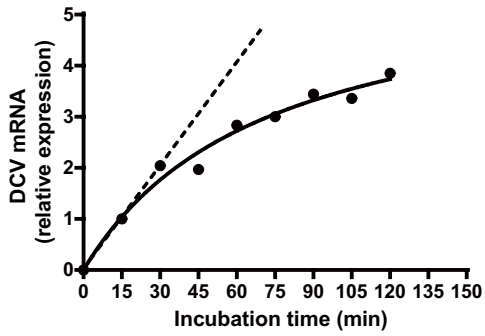

# Supplemental Figure 4

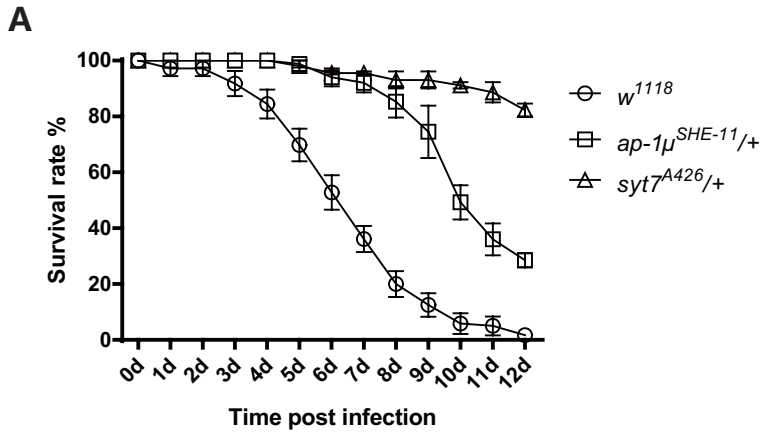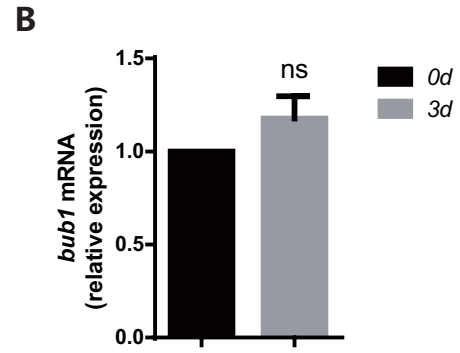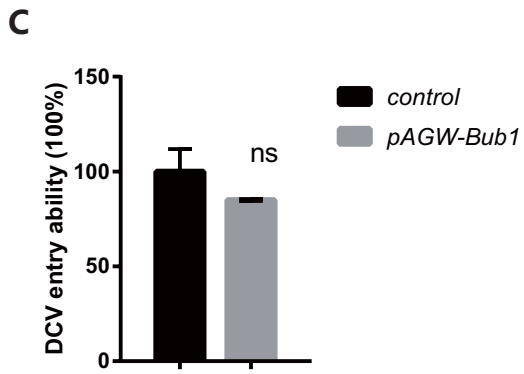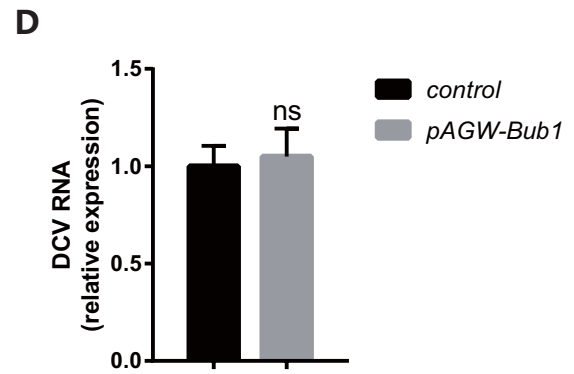



# Supplemental Figure 5

A

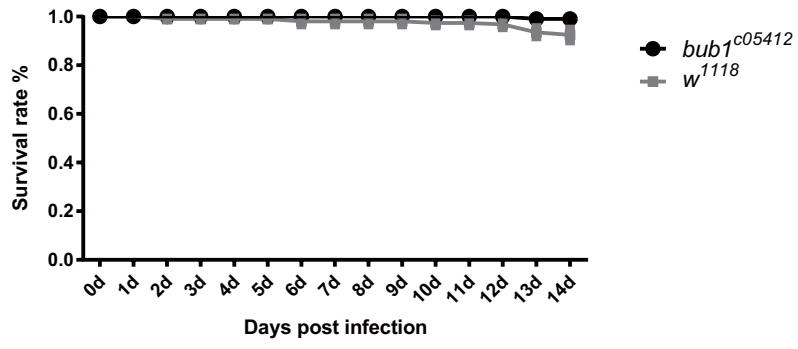

# Supplemental Figure 6

**A**

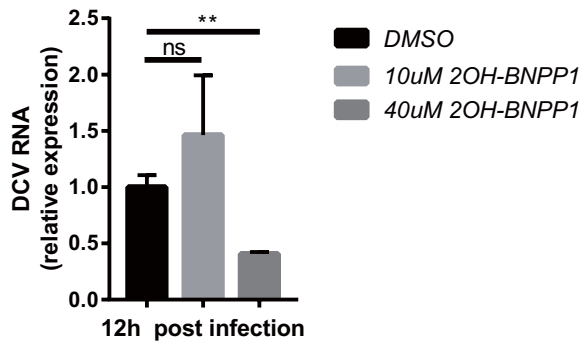

**B**

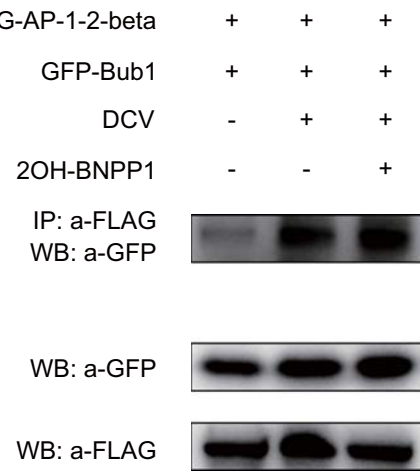

Supplement: zjv018183851s1.pdf [file zjv018183851s1.pdf]
